# Supplementary material for: Changes in Organic Acids, Phenolic Compounds, and Antioxidant Activities of Lemon Juice Fermented by Issatchenkia terricola
Source: MDPI journal article supplement (doi:10.3390/molecules26216712), 2021-11-05
Supplement: s1 [file s1]

Supplimentary table S1 Sensory evaluation standards of fermented and control lemon juice

| Items                        | Description                                                               | Score |
|------------------------------|---------------------------------------------------------------------------|-------|
| Clarity/20                   | The fruit juice is uniform in texture, clear and without precipitation    | 16-20 |
|                              | The fruit juice is slightly clear with a small amount of floccule         | 11-15 |
|                              | The fruit juice is uneven in texture with a small amount of precipitation | 6-10  |
|                              | The fruit juice is uneven in texture, cloudy and precipitated             | 1-5   |
| Fruity/30                    | Typical lemon flavor, pleasant and gentle aroma                           | 21-30 |
|                              | Exhibits lemons aroma but a little bit lighter                            | 11-20 |
|                              | No lemons aroma                                                           | 0-10  |
| Taste/30                     | Sweet and sour, refreshing on the mouth, good palatability                | 26-30 |
|                              | A little bit tart , average flavor, average palatability                  | 21-25 |
|                              | Distinctly sour, with no bitter taste                                     | 16-20 |
|                              | Distinctly sour, astringent, bitter                                       | 0-15  |
| Overall<br>acceptability /20 | High acceptance                                                           | 16-20 |
|                              | Average acceptance                                                        | 11-15 |
|                              | Poor acceptance                                                           | 1-10  |
| Total score/100              |                                                                           | 100   |

Supplimentary table S2 Pearson correlation matrix of physicochemical properties and antioxidant activity in fermented lemon juice

|                                                  | Total<br>titratable<br>acidity | Total<br>sugar | Reducing<br>sugar | pH      | Total<br>Phenolic | Total<br>flavonoid | ABTS <sup>+</sup> radical<br>scavenging<br>activity | Total<br>reductive<br>ability |
|--------------------------------------------------|--------------------------------|----------------|-------------------|---------|-------------------|--------------------|-----------------------------------------------------|-------------------------------|
| Total titratable acidity                         | 1                              |                |                   |         |                   |                    |                                                     |                               |
| Total sugar                                      | 0.789*                         | 1              |                   |         |                   |                    |                                                     |                               |
| Reducing sugar                                   | 0.890*                         | 0.928*         | 1                 |         |                   |                    |                                                     |                               |
| pH                                               | -0.924*                        | -0.568         | -0.722*           | 1       |                   |                    |                                                     |                               |
| Total Phenolic                                   | 0.812*                         | 0.856*         | 0.787*            | -0.711* | 1                 |                    |                                                     |                               |
| Total flavonoid                                  | 0.892*                         | 0.864*         | 0.963*            | -0.690* | 0.665*            | 1                  |                                                     |                               |
| ABTS <sup>+</sup> radical scavenging<br>activity | 0.832*                         | 0.838*         | 0.820*            | -0.590  | 0.815*            | 0.840*             | 1                                                   |                               |
| Total reductive ability                          | 0.890*                         | 0.630*         | 0.758*            | -0.802* | 0.719*            | 0.750*             | 0.835*                                              | 1                             |

\* Significant correlation at 0.05 level (two-tailed).
